# Supplementary material for: Prodrugs of the Archetypal Dynamin Inhibitor Bis‐T‐22
Source: PubMed Central journal article supplement — ChemMedChem. 2022 Nov 9;17(24):e202200400. doi: 10.1002/cmdc.202200400 (PMC10947042; doi:10.1002/cmdc.202200400), 2022-11-09
Supplement: CMDC-17-0-s001.pdf [file CMDC-17-0-s001.pdf]

# ChemMedChem

Supporting Information

## **Prodrugs of the Archetypal Dynamain Inhibitor Bis-T-22**

Luke R. Odell, Mark J Robertson, Kelly A Young, Andrew B. McGeachie, Annie Quan,  
Phillip J. Robinson, and Adam McCluskey\*

## Supplementary Data:

### <sup>1</sup>H and <sup>13</sup>C Spectra for Compounds 1-10;

#### Contents

- *2-Cyano-N-[3-(2-cyanoacetyl-amino)propyl]acetamide (1)*
- *2-Cyano-N-[3-[2-cyano-3-(3,4-dihydroxyphenyl)acryloylamino]propyl]-3-(3,4-dihydroxyphenyl)acrylamide (2)*
- *Acetic acid 2-acetoxy-5-(2-cyano-2-[3-[2-cyano-3-(3,4-diacetoxyphenyl)acryloylamino]propylcarbamoyl]vinyl)phenyl ester (3)*
- *Propionic acid 5-(2-[3-[3-(3,4-bis-propionyloxyphenyl)-2-cyanoacryloylamino]propylcarbamoyl]-2-cyanovinyl)-2-propionyloxyphenyl ester (4)*
- *Butyric acid 5-(2-[3-[3-(3,4-bis-butyryloxyphenyl)-2-cyanoacryloylamino]propylcarbamoyl]-2-cyanovinyl)-2-butyryloxyphenyl ester (5)*
- *Isobutyric acid 5-(2-[3-[3-(3,4-bis-isobutyryloxyphenyl)-2-cyanoacryloylamino]propylcarbamoyl]-2-cyanovinyl)-2-isobutyryloxyphenyl ester (6)*
- *Isobutyryloxy-carbonyl acid 5-(2-[3-[3-(3,4-bis-isobutyryloxy-carbonylphenyl)-2-cyanoacryloylamino]propylcarbamoyl]-2-cyanovinyl)-2-isobutyryloxy-carbonylphenyl ester (7)*
- *Hexanoic acid 5-(2-[3-[3-(3,4-bis-hexanoyloxyphenyl)-2-cyanoacryloylamino]propylcarbamoyl]-2-cyanovinyl)-2-hexanoyloxyphenyl ester (8)*
- *2,2-Dimethyl-propionic acid 5-[2-[3-[3-(3,4-bis-(2,2-dimethylpropionyloxy)phenyl)-2-cyanoacryloylamino]propylcarbamoyl]-2-cyanovinyl]-2-(2,2-dimethylpropionyloxy)phenyl ester (9)*
- *Dimethylcarbamic acid 5-(2-[3-[3-(3,4-bis-dimethylcarbamoyloxyphenyl)-2-cyanoacryloylamino]propylcarbamoyl]-2-cyanovinyl)-2-dimethylcarbamoyloxy phenyl ester (10)*

The effect of Bis-T-22 and Pro-Bis-T-22 (4) on the internalisation of EGF-TxR in HeLa cells;

The effect of 100 mM Bis-T-22 on TxR-Tfn endocytosis in seven cell lines



2-Cyano-N-{3-[2-cyano-3-(3,4-dihydroxyphenyl)acryloylamino]propyl}-3-(3,4-dihydroxyphenyl)acrylamide (**2**)

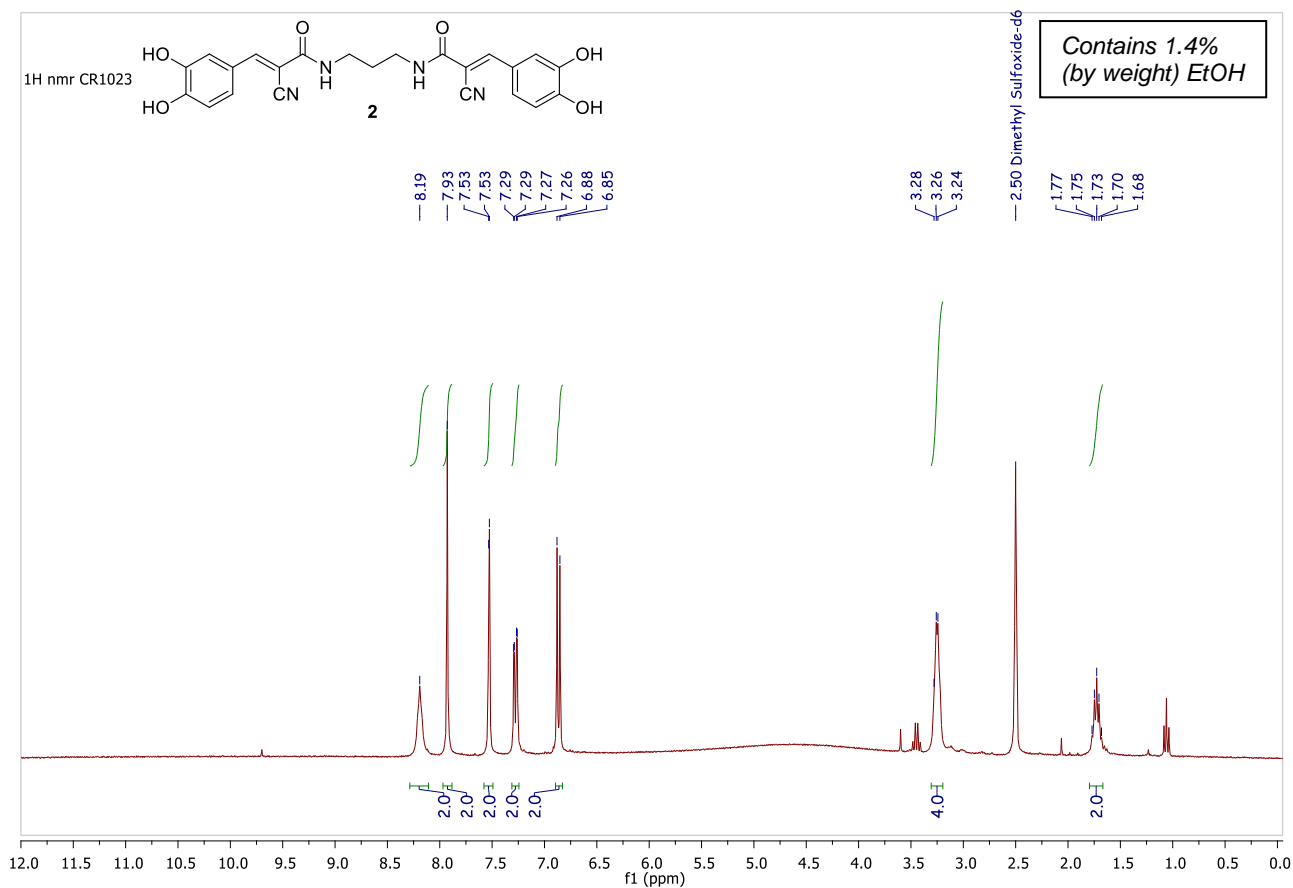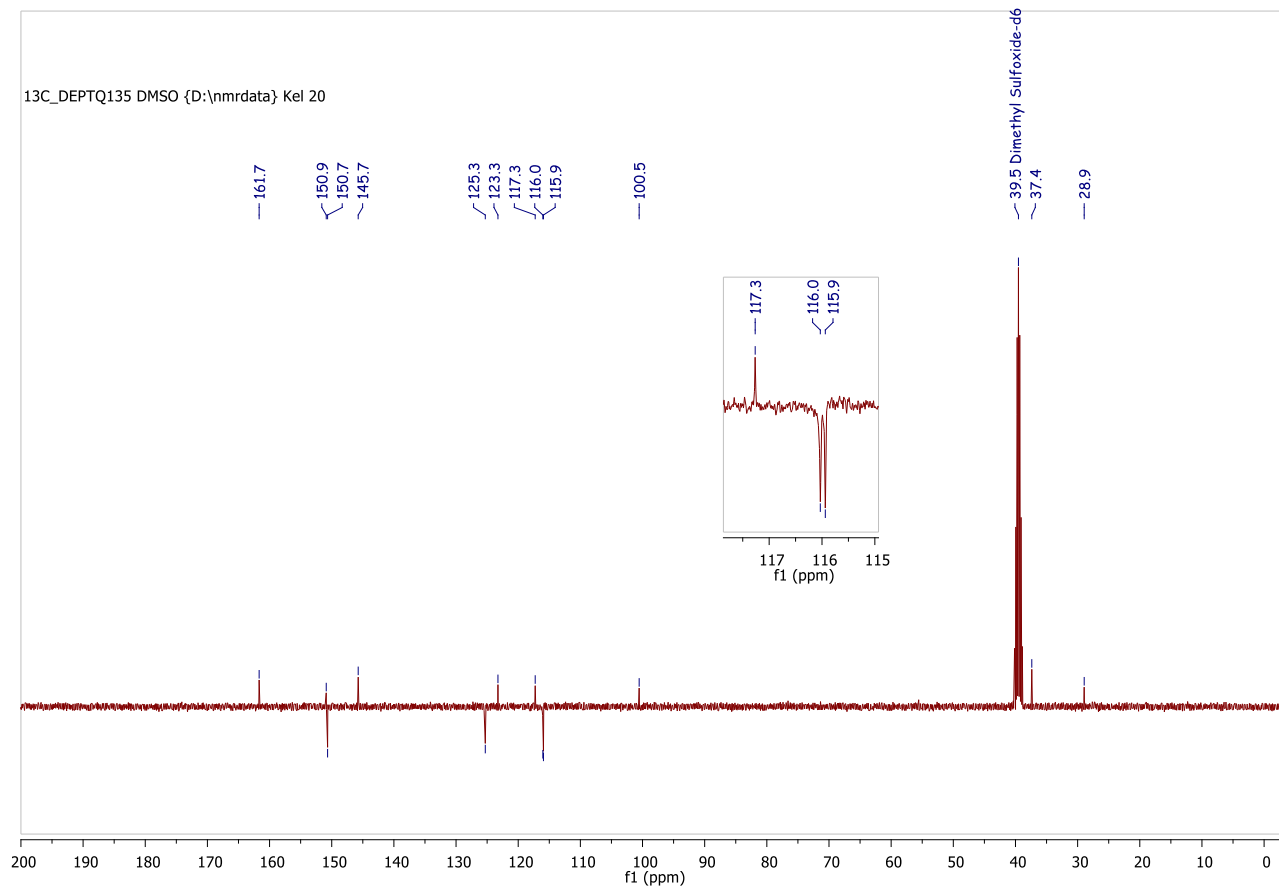

Acetic acid 2-acetoxy-5-(2-cyano-2-{3-[2-cyano-3-(3,4-diacetoxyphenyl)acryloylamino]propylcarbamoyl}vinyl)phenyl ester (**3**)

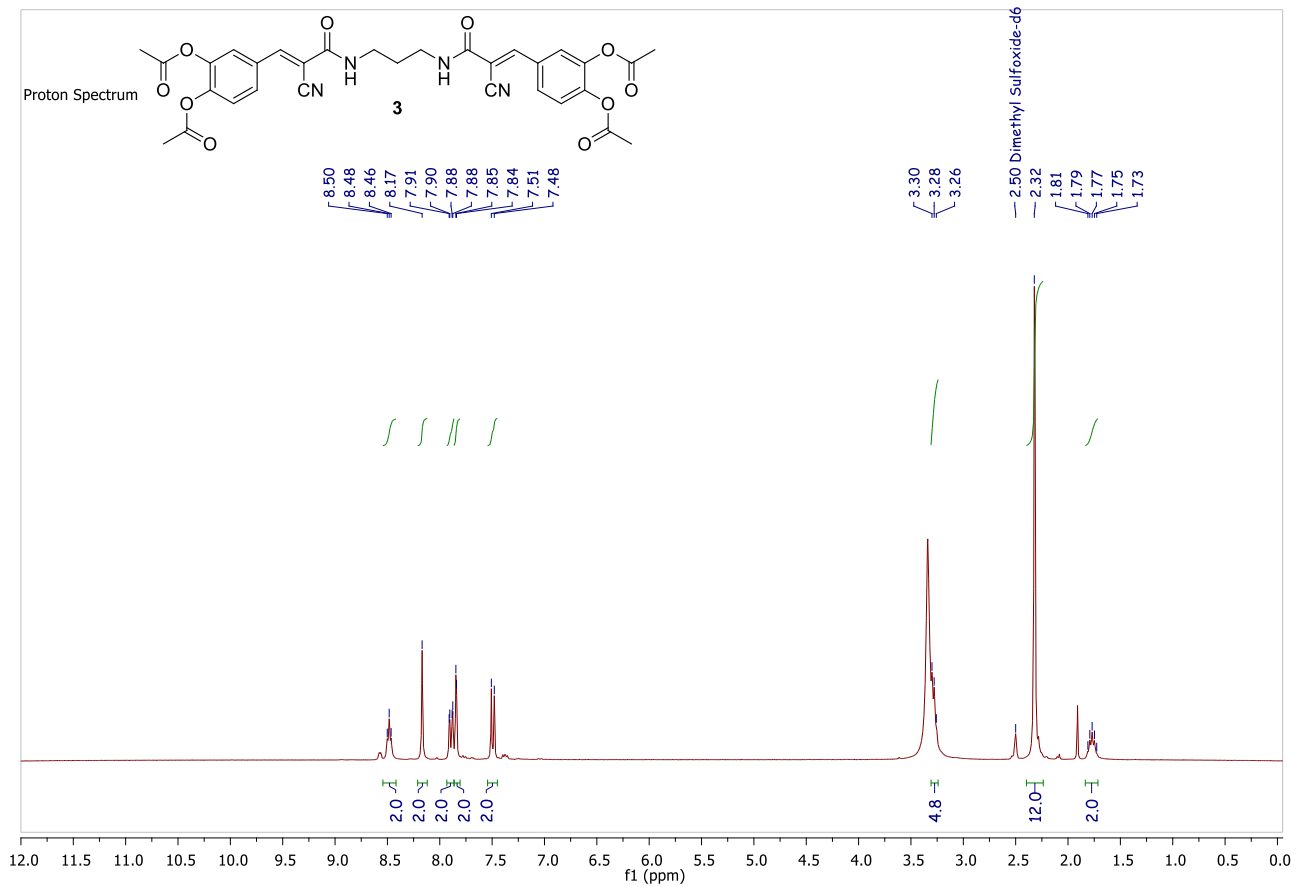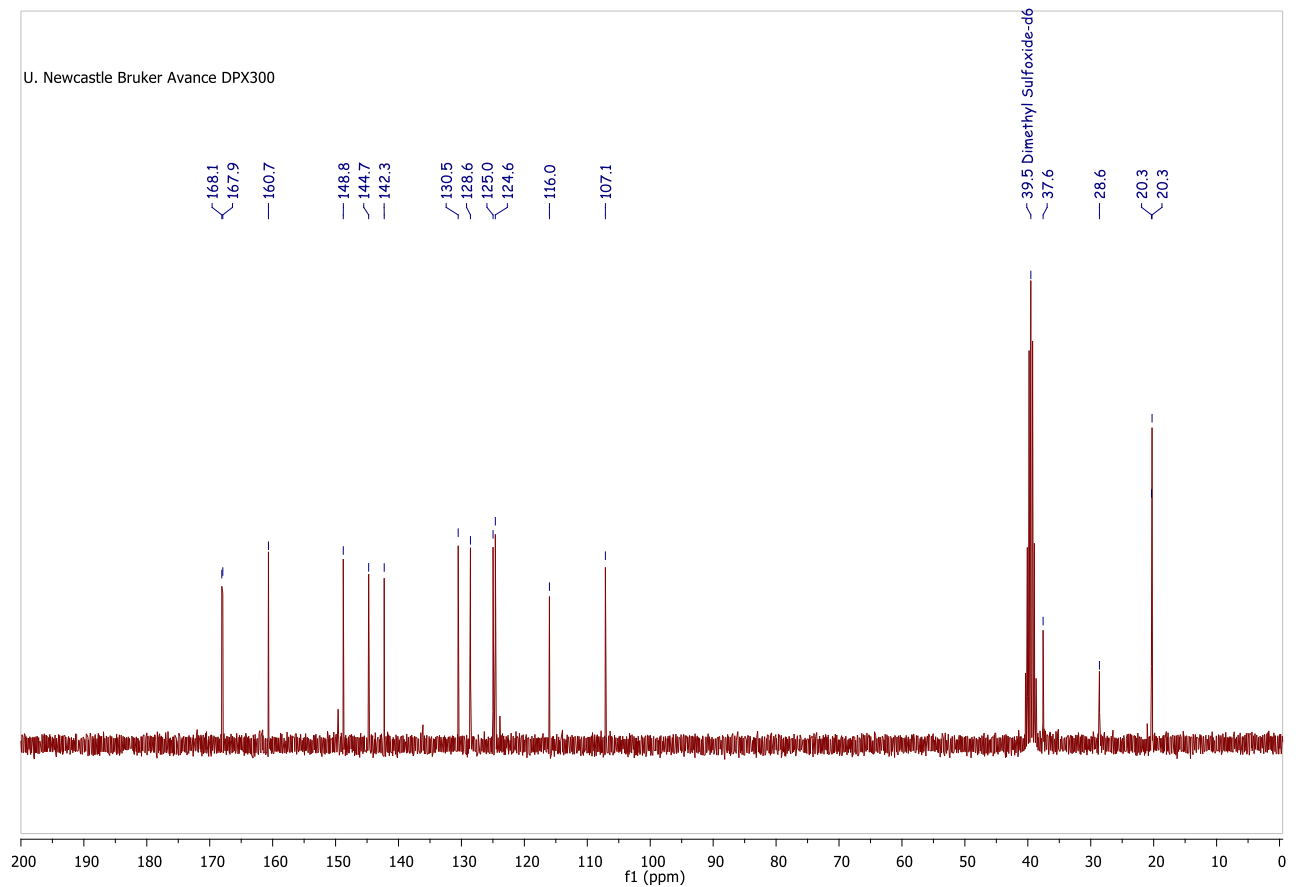

Propionic acid 5-(2-(3-(3,4-bis-propionyloxyphenyl)-2-cyanoacryloylamino)propylcarbamoyl)-2-cyanovinyl)-2-propionyloxyphenyl ester (**4**)

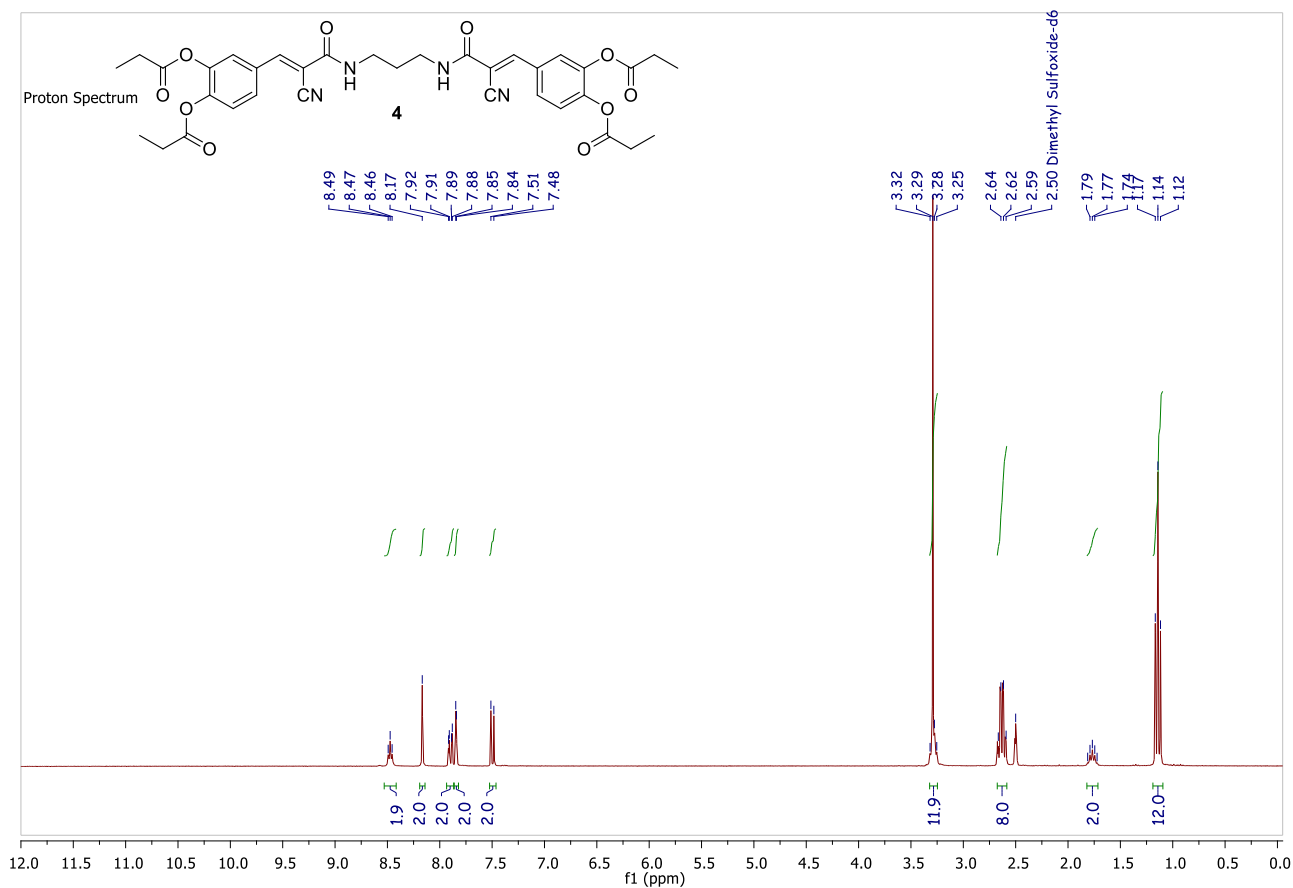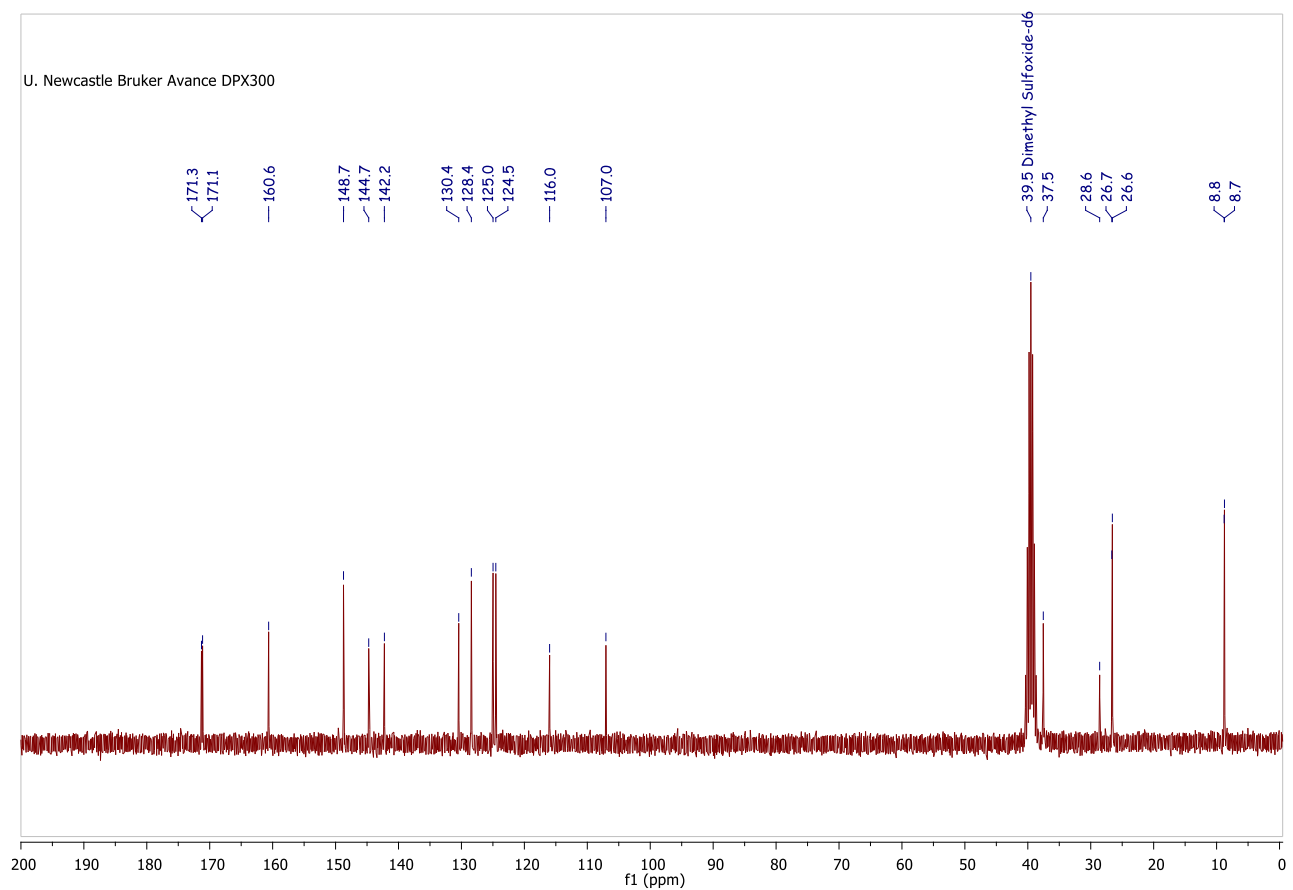

*Butyric acid 5-(2-(3-(3,4-bis-butyryloxyphenyl)-2-cyanoacryloylamino)propylcarbamoyl)-2-cyanovinyl)-2-butyryloxyphenyl ester (5)*

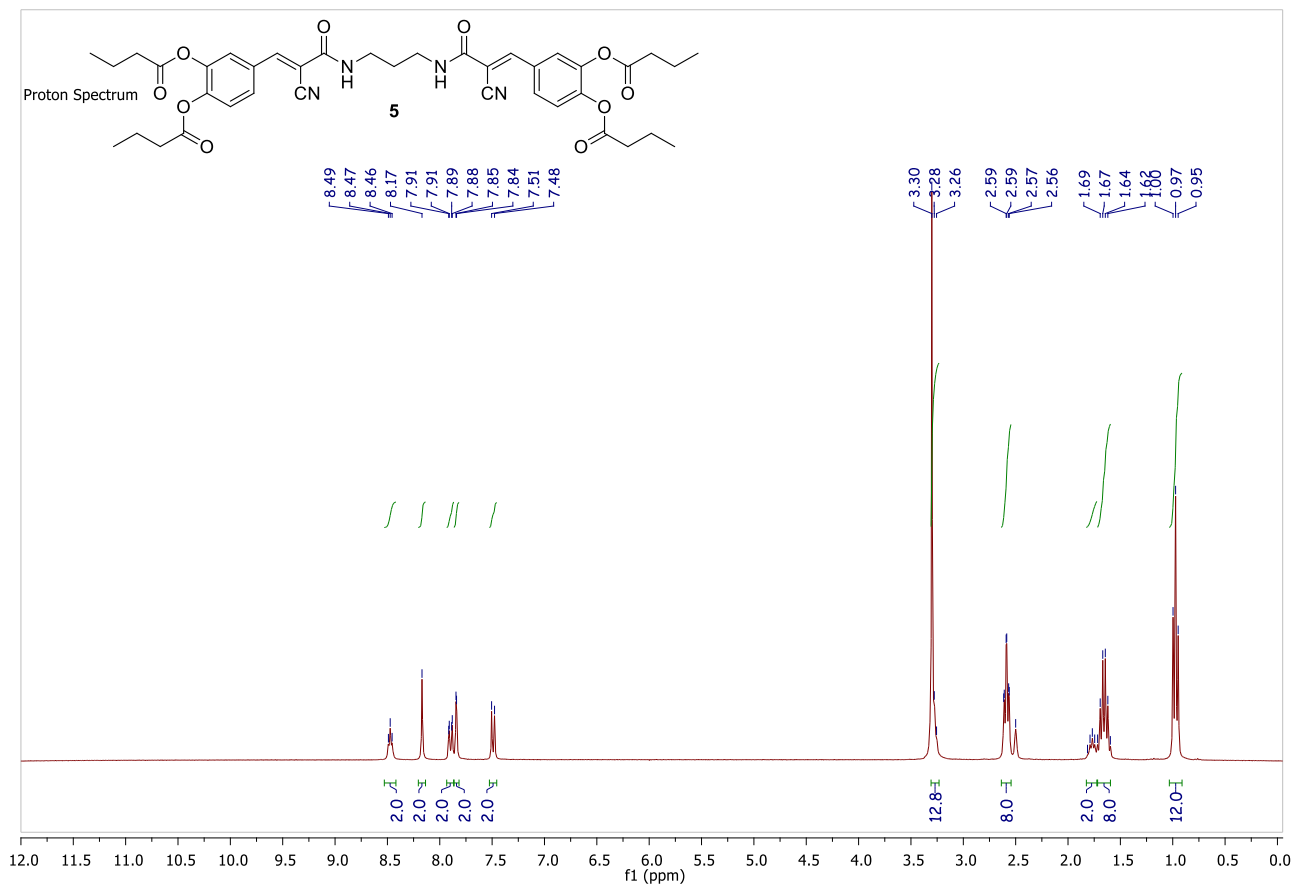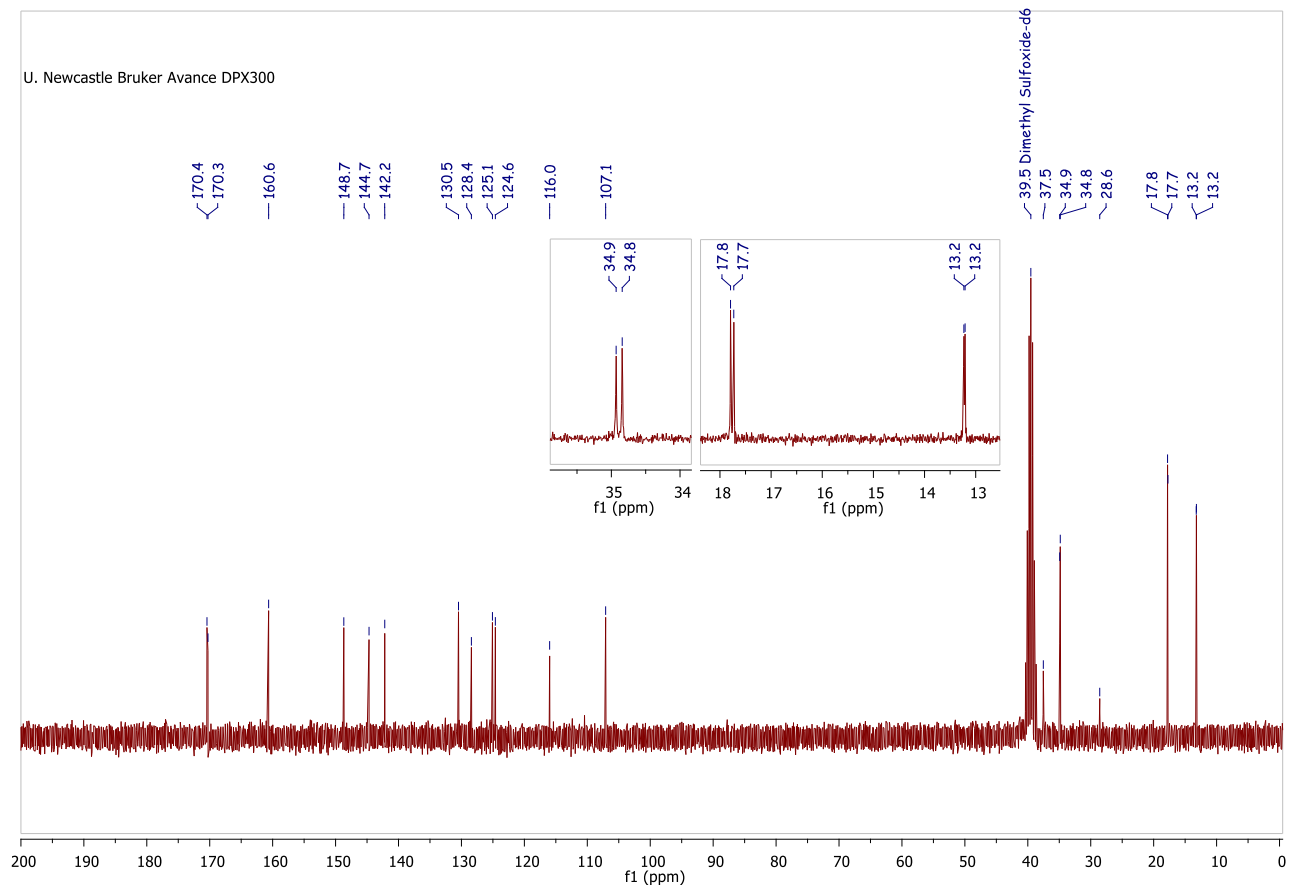

*Isobutyric acid 5-(2-{3-[3-(3,4-bis-isobutyryloxyphenyl)-2-cyanoacryloylamino]propylcarbamoyl}-2-cyanovinyl)-2-isobutyryloxyphenyl ester (6)*

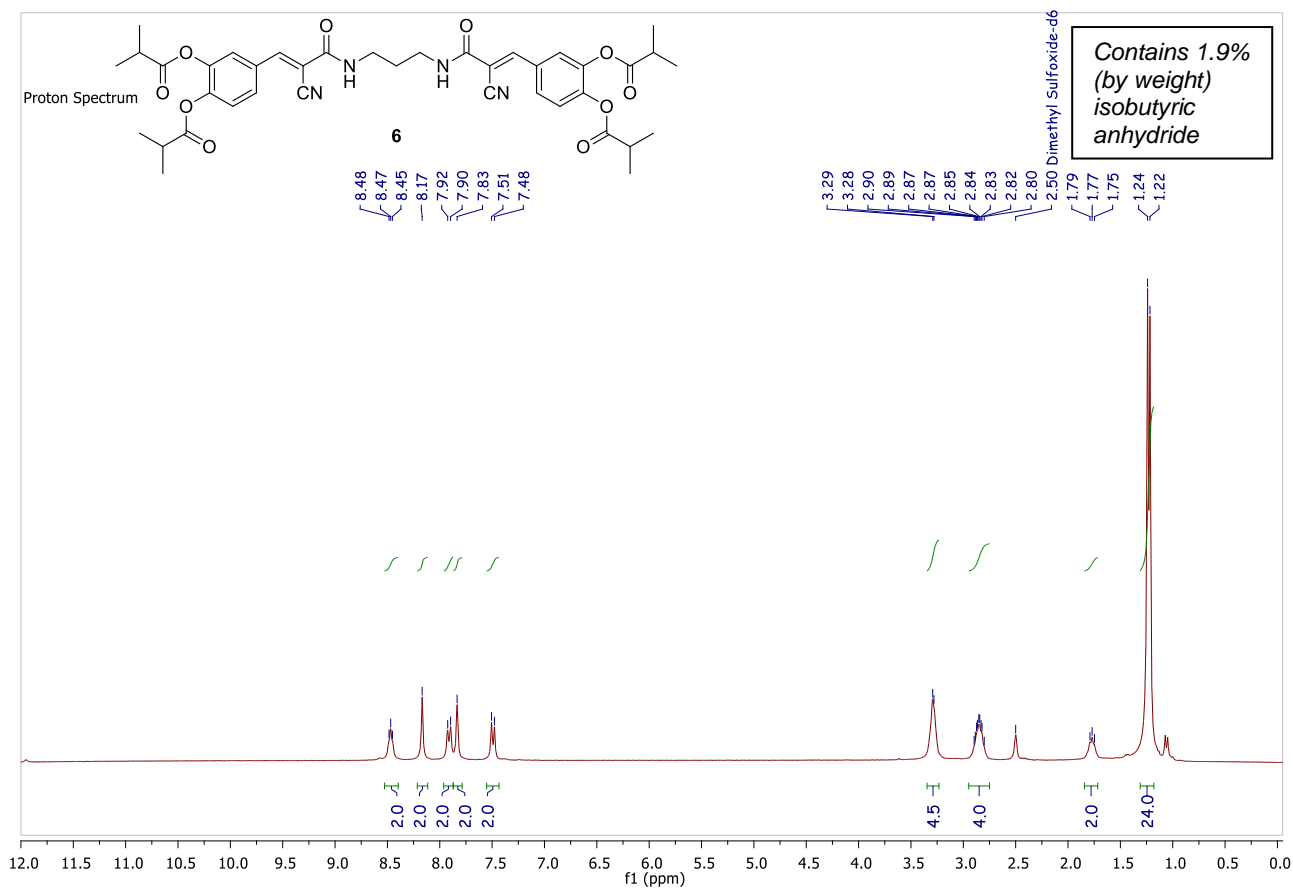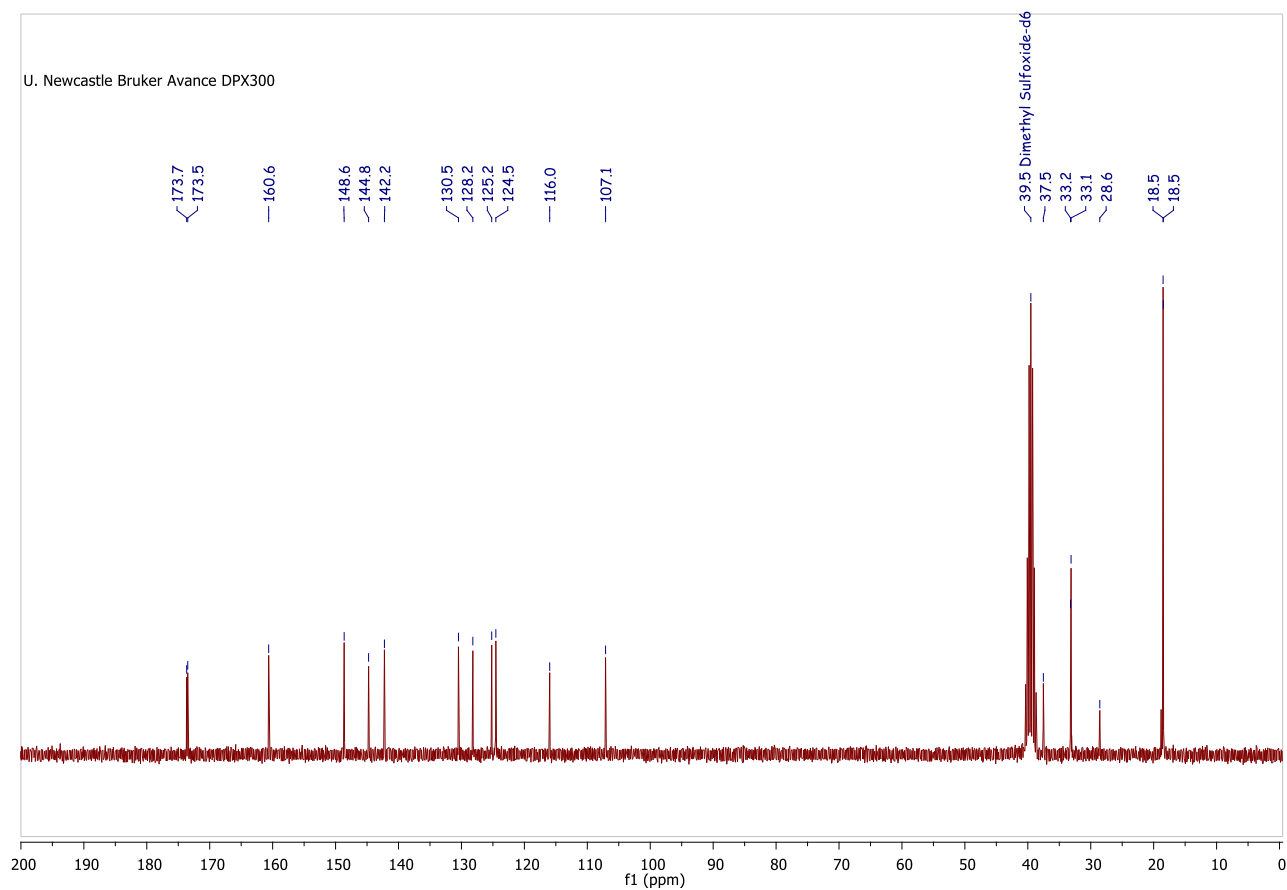



*Isobutyloxylcarbonyl acid 5-(2-{3-[3-(3,4-bis-isobutyryloxyphenyl)-2-cyanoacryloylamino]propylcarbamoyl}-2-cyanovinyl)-2-isobutyryloxyphenyl ester (7)*

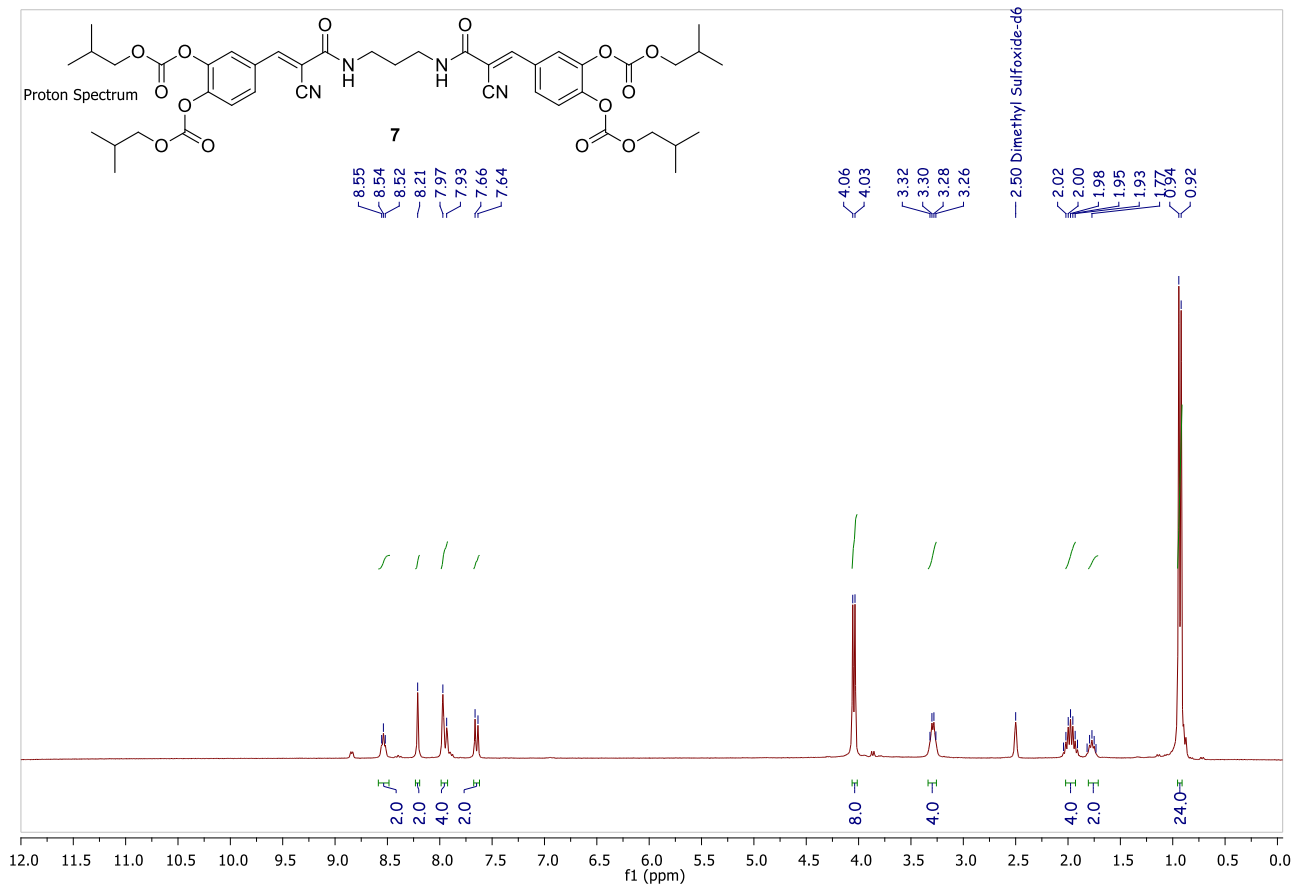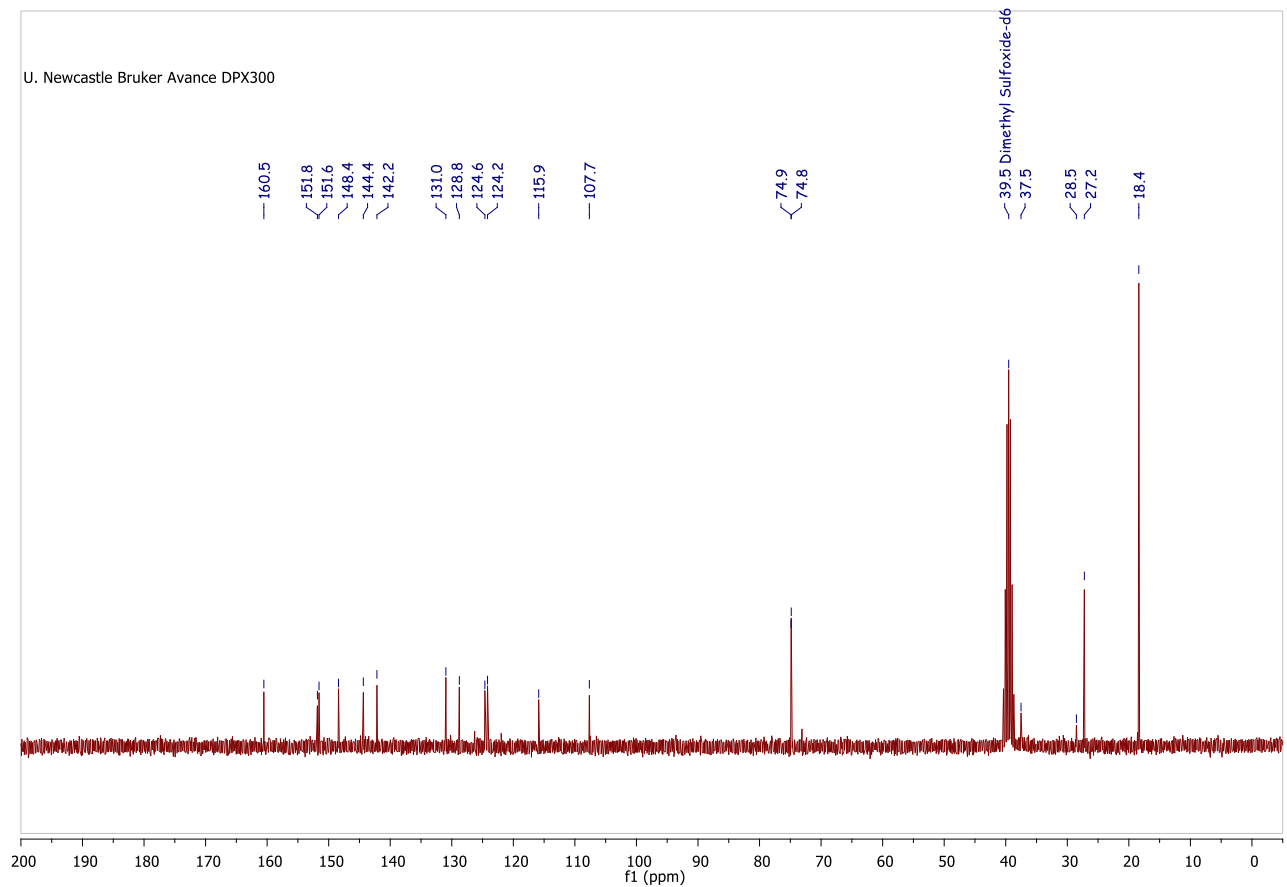

Hexanoic acid 5-(2-(3-(3,4-bis-hexanoyloxyphenyl)-2-cyanoacryloylamino)-propylcarbamoyl)-2-cyanovinyl)-2-hexanoyloxyphenyl ester (**8**)

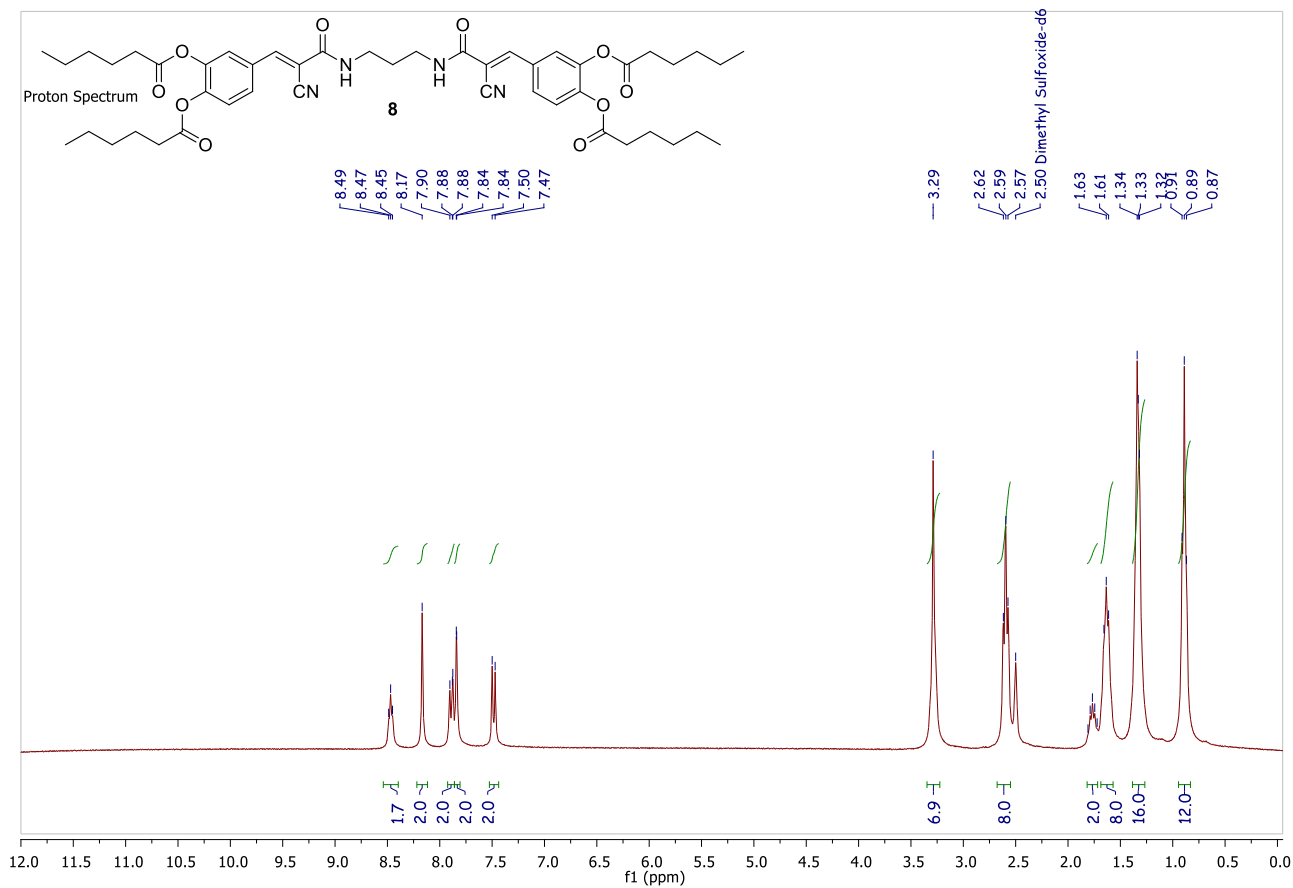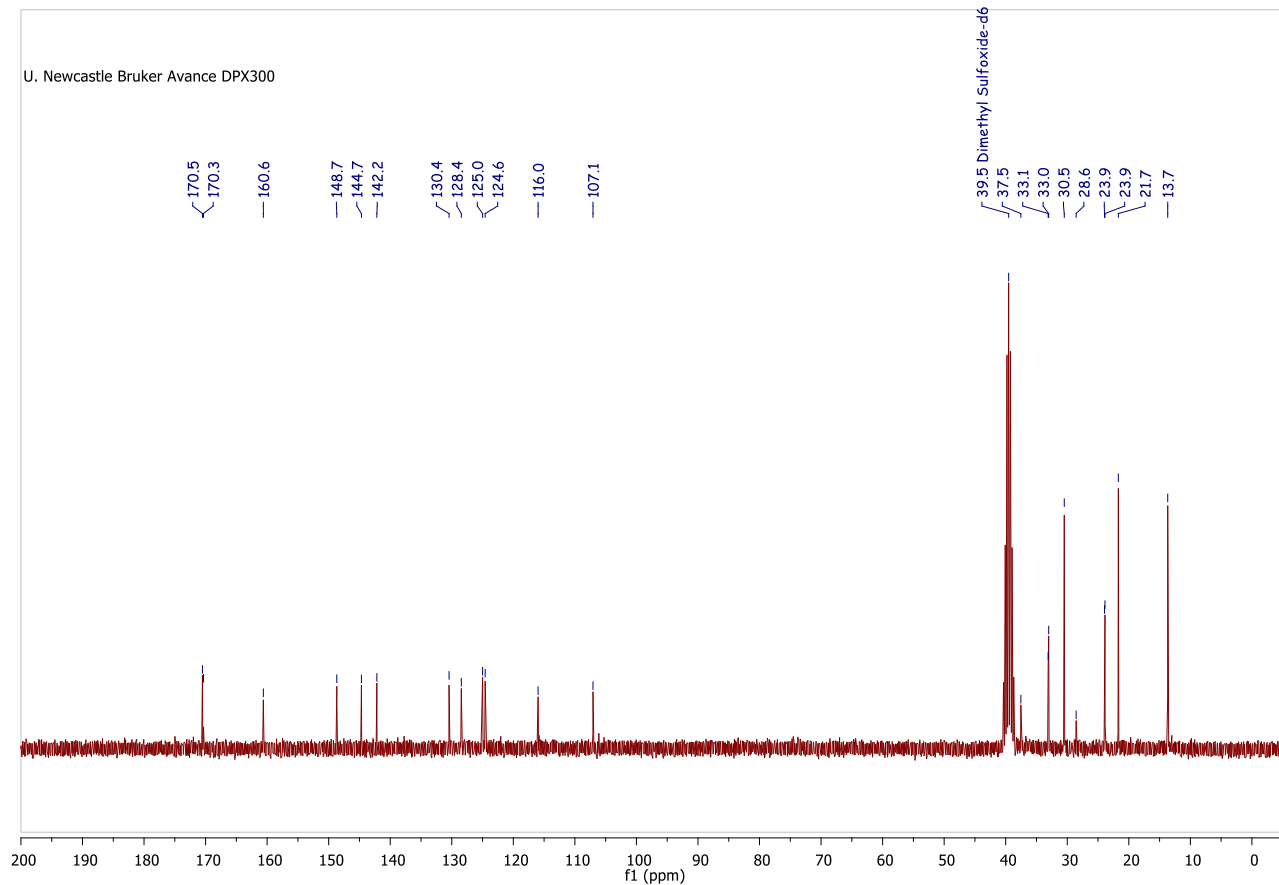

2,2-Dimethyl-propionic acid 5-[2-(3-{3-[3,4-bis-(2,2-dimethylpropionyloxy)phenyl]-2-cyanoacryloyl amino}propylcarbamoyl)-2-cyanovinyl]-2-(2,2-dimethylpropionyloxy)phenyl ester (9)

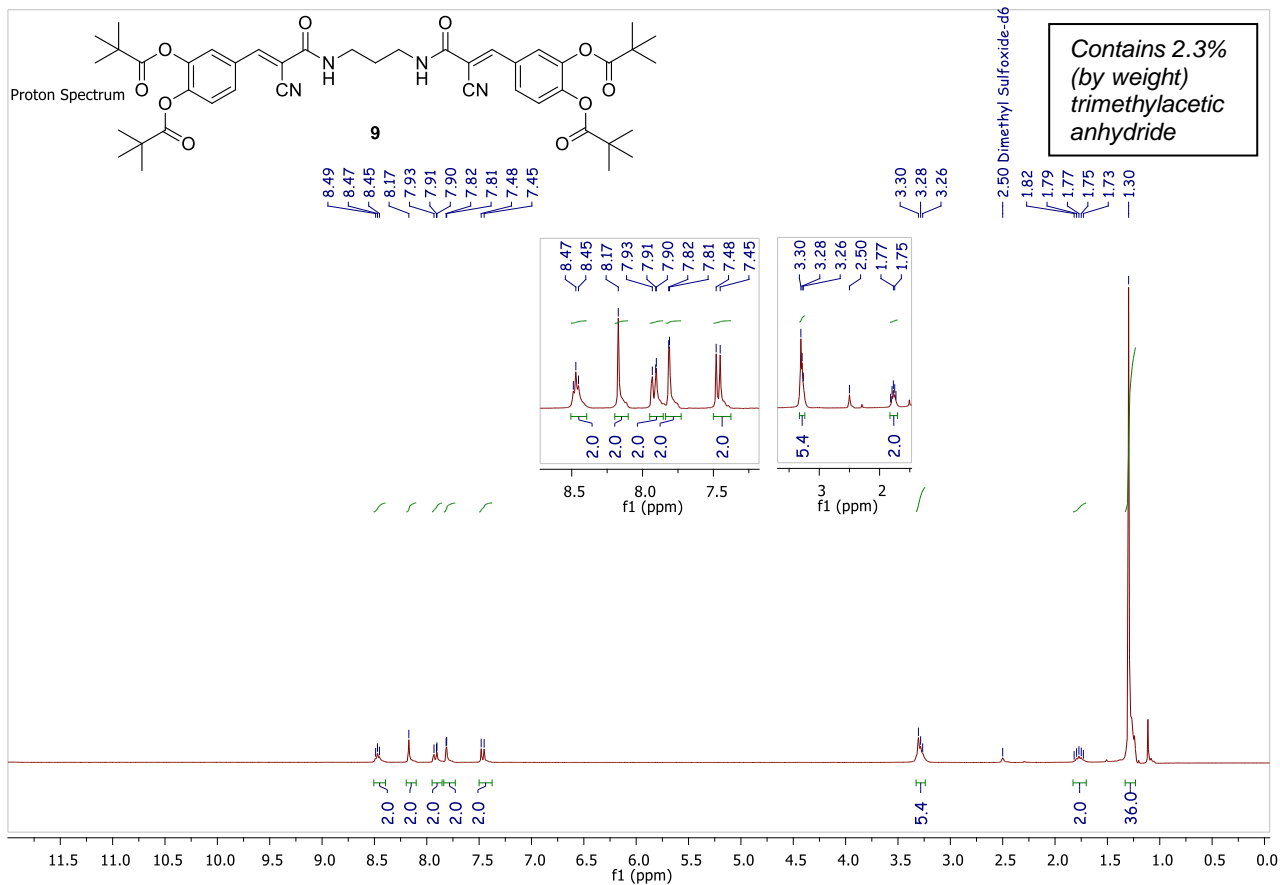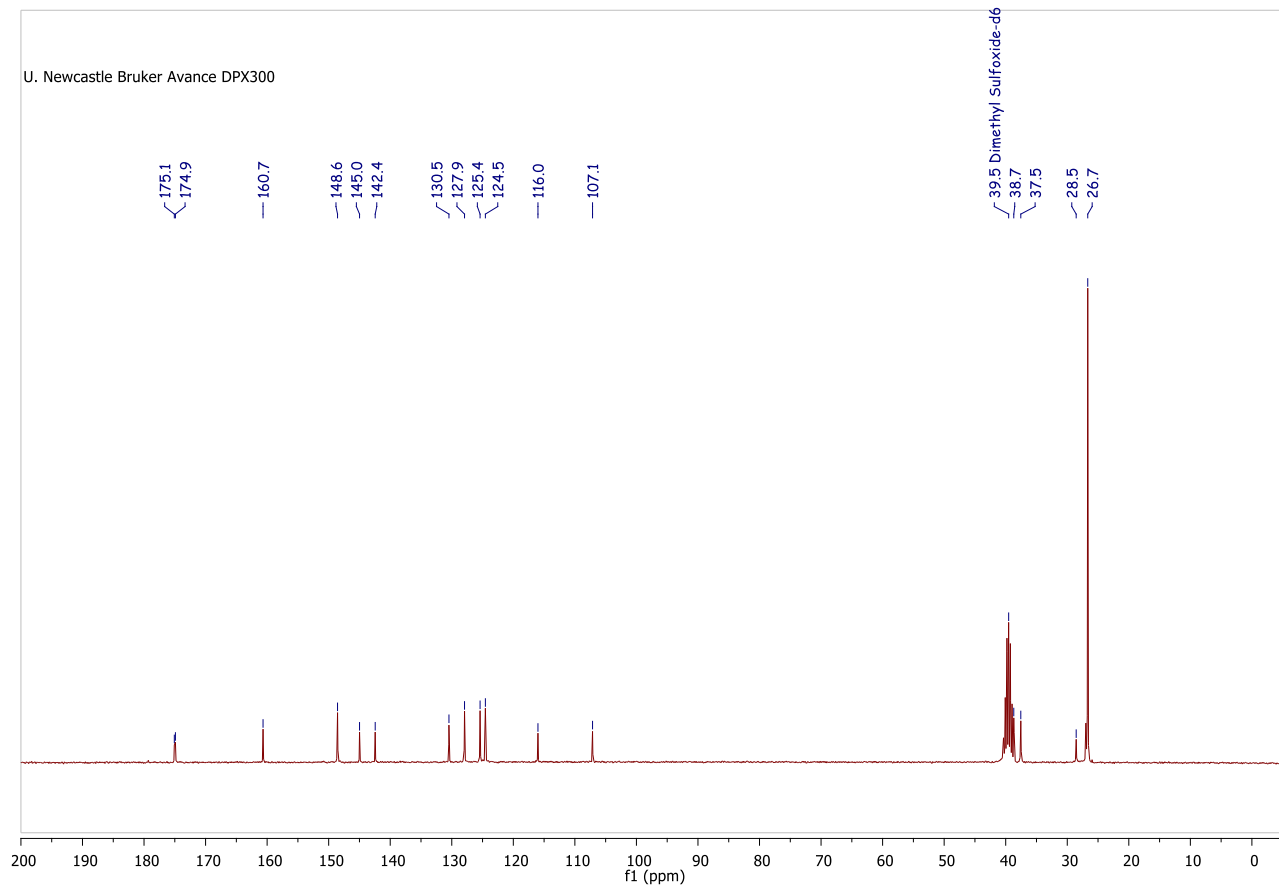

*Dimethylcarbamic acid 5-(2-{3-[3-(3,4-bis-dimethylcarbamoyloxyphenyl)-2-cyanoacryloylamino]propylcarbamoyl}-2-cyanovinyl)-2-dimethylcarbamoyloxy phenyl ester (10)*

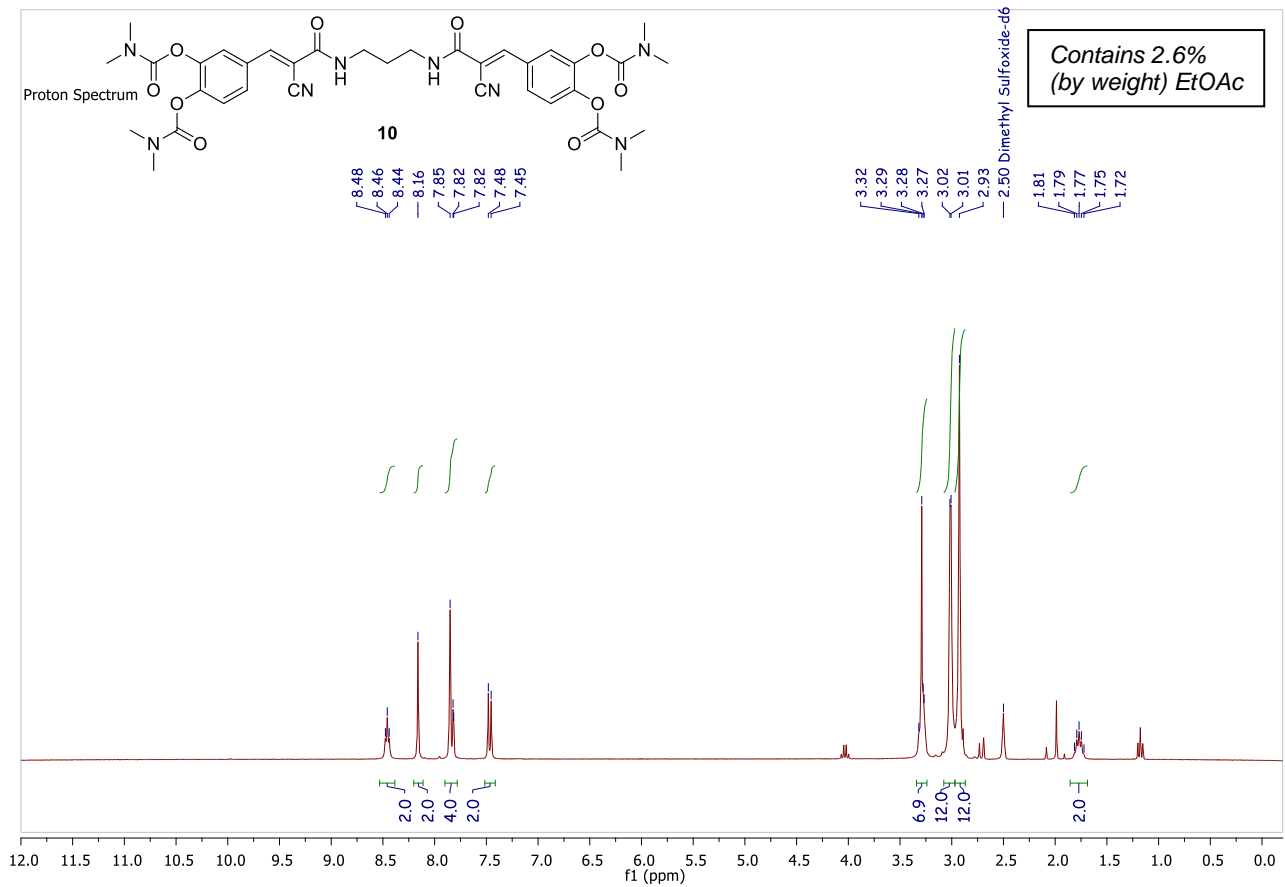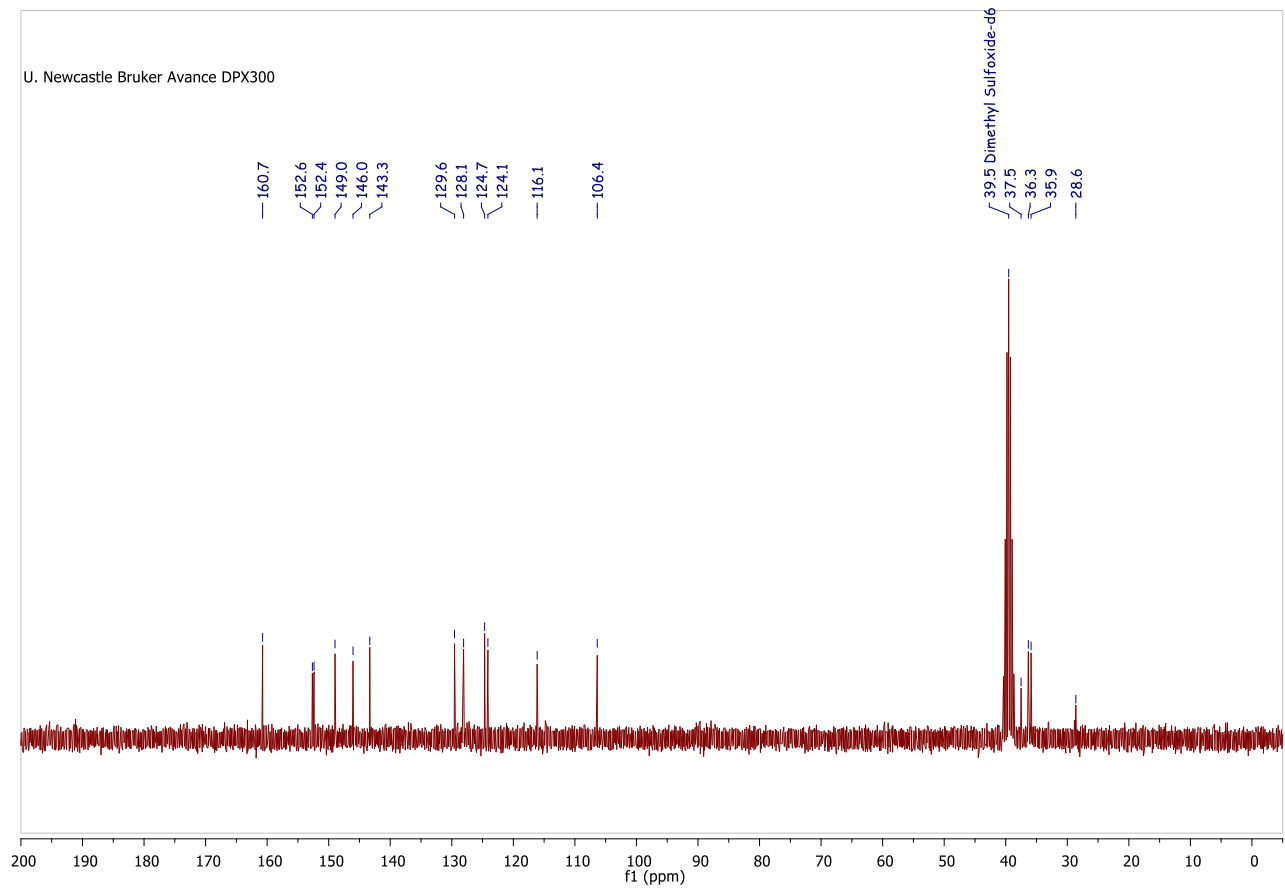

## Supplementary Figure S1

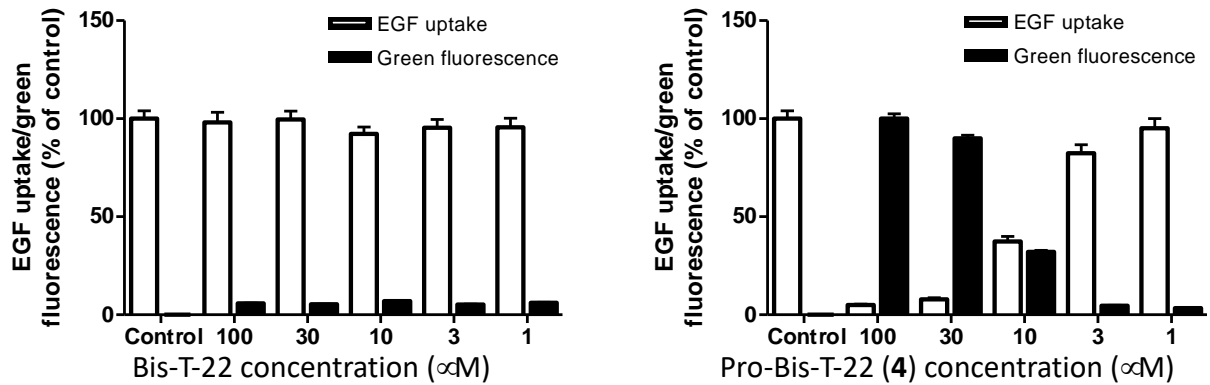

The effects of Bis-T-22 and (4) on internalisation of EGF-TxR in HeLa cells. Cultured cells were incubated with 1  $\mu$ g/ml EGF-TxR for 10 min at 37°C, acid washed, fixed and internalised Tfn-TxR detected by fluorescence microscopy.

The above figure shows the relationship between green fluorescent intensity and the level of EGF-TxR uptake in COS7 cells.

**Left Panel:** At all concentrations of Bis-T-22 there was no significant level of green fluorescence detected in cells and no effect of EGF uptake.

**Right Panel:** The level of green fluorescence within cells was proportional to the concentration of (4) and this was inversely related to the uptake of EGF.

**Supplementary Table S1.** The effect of 100  $\mu$ M Bis-T-22 (**2**) on the uptake of a transferrin red dye (TxR-Tfn) by endocytosis in a panel of 7 cell lines. The compound was present for 15 min (this Table) but the results were the same after 60 min drug exposure (not shown). The amount of TxR-Tfn uptake was visually assessed and score from 1 to 5 "+" symbols for the degree of inhibition.

| Cell Line | Effect of Bis-T-22 |
|-----------|--------------------|
| Swiss 3T3 | ++++               |
| HER14     | ++++               |
| B104      | +++                |
| A431      | ++                 |
| B35       | +                  |
| HeLa      | +                  |
| COS-7     | +                  |

++++ = endocytosis fully blocked; + = endocytosis unaffected

## Supplementary Table S2

| Compound                                                                                                                                                                                   | HRMS Calculated for                                                       | Found    |
|--------------------------------------------------------------------------------------------------------------------------------------------------------------------------------------------|---------------------------------------------------------------------------|----------|
| <i>Acetic acid 2-acetoxy-5-(2-cyano-2-{3-[2-cyano-3-(3,4-diacetoxyphenyl) acryloylamino]propylcarbamoyl}vinyl)phenyl ester (3)</i>                                                         | C <sub>31</sub> H <sub>28</sub> N <sub>4</sub> O <sub>10</sub> ; 616.1805 | 616.1823 |
| <i>Propionic acid 5-(2-{3-[3-(3,4-bis-propionyloxyphenyl)-2-cyanoacryloylamino]propylcarbamoyl}-2-cyanovinyl)-2-propionyloxyphenyl ester (4)</i>                                           | C <sub>35</sub> H <sub>36</sub> N <sub>4</sub> O <sub>10</sub> ; 672.2431 | 672.2444 |
| <i>Butyric acid 5-(2-{3-[3-(3,4-bis-butyryloxyphenyl)-2-cyanoacryloylamino]propylcarbamoyl}-2-cyanovinyl)-2-butyryloxyphenyl ester (5)</i>                                                 | C <sub>39</sub> H <sub>44</sub> N <sub>4</sub> O <sub>10</sub> ; 728.3057 | 728.3071 |
| <i>Isobutyric acid 5-(2-{3-[3-(3,4-bis-isobutyryloxyphenyl)-2-cyanoacryloylamino]propylcarbamoyl}-2-cyanovinyl)-2-isobutyryloxyphenyl ester (6)</i>                                        | C <sub>39</sub> H <sub>44</sub> N <sub>4</sub> O <sub>10</sub> ; 728.3057 | 728.3062 |
| <i>Isobutyryloxy carbonyl acid 5-(2-{3-[3-(3,4-bis-isobutyryloxy carbonylphenyl)-2-cyanoacryloylamino]propylcarbamoyl}-2-cyanovinyl)-2-isobutyryloxy carbonylphenyl ester (7)</i>          | C <sub>47</sub> H <sub>60</sub> N <sub>4</sub> O <sub>14</sub> ; 904.4106 | 904.4119 |
| <i>Hexanoic acid 5-(2-{3-[3-(3,4-bis-hexanoyloxyphenyl)-2-cyanoacryloylamino]propylcarbamoyl}-2-cyanovinyl)-2-hexanoyloxyphenyl ester (8)</i>                                              | C <sub>47</sub> H <sub>60</sub> N <sub>4</sub> O <sub>10</sub> ; 840.4309 | 840.4322 |
| <i>2,2-Dimethyl-propionic acid 5-[2-{3-[3-(3,4-bis-(2,2-dimethylpropionyloxy)phenyl]-2-cyanoacryloyl amino]propylcarbamoyl}-2-cyanovinyl]-2-(2,2-dimethylpropionyloxy)phenyl ester (9)</i> | C <sub>43</sub> H <sub>52</sub> N <sub>4</sub> O <sub>10</sub> ; 784.3683 | 784.3690 |
| <i>Dimethylcarbamic acid 5-(2-{3-[3-(3,4-bis-dimethylcarbamoxyloxyphenyl)-2-cyanoacryloylamino]propylcarbamoyl}-2-cyanovinyl)-2-dimethylcarbamoxyloxy phenyl ester (10)</i>                | C <sub>35</sub> H <sub>40</sub> N <sub>8</sub> O <sub>10</sub> ; 732.2867 | 732.2880 |
